# Supplementary material for: The Impact of the “Osteo” Component of Osteosarcopenia on Fragility Fractures in Post-Menopausal Women
Source: MDPI journal article supplement (doi:10.3390/ijms22105256), 2021-05-17
Supplement: s1 [file s1]

**Supplementary Table S1.** The summary of the “osteo” component of osteosarcopenia

|                                                                    |                                                                                                                                                                                                                                           |
|--------------------------------------------------------------------|-------------------------------------------------------------------------------------------------------------------------------------------------------------------------------------------------------------------------------------------|
| The “osteo” component of osteosarcopenia associated with fractures | (1) osteoporosis (T-score $\leq -2.5$ SD) shown in Table 2                                                                                                                                                                                |
|                                                                    | (2) osteopenia/osteoporosis (T-score $< -1$ SD) shown in Table 3                                                                                                                                                                          |
|                                                                    | (3) 1. osteopenia ( $-2.5$ SD $<$ T-score $< -1$ SD) with a 10-year risk of major osteoporotic fracture $\geq 20\%$ or risk of hip fracture $\geq 3\%$ based on the FRAX and<br>2. osteoporosis (T-score $\leq -2.5$ SD) shown in Table 4 |

**Supplementary Table S2.** Trabecular bone score according to fractures

|          | Trabecular bone score |                    |          |
|----------|-----------------------|--------------------|----------|
|          | Mean                  | Standard deviation | <i>p</i> |
| Fracture |                       |                    |          |
| Yes      | 1.239                 | 0.080              | <0.001   |
| No       | 1.272                 | 0.085              |          |
